# Supplementary material for: Correlation between evoked neurotransmitter release and adaptive functions in SYT1-associated neurodevelopmental disorder
Source: PubMed Central journal article supplement (PMC11564929; doi:10.1016/j.ebiom.2024.105416), 2024-10-30
Supplement: mmc1.pdf [file mmc1.pdf]

## Supplementary Material

**Supplementary Table 1. Primers used for site-directed mutagenesis of SYT1-pH variants. Mutated bases in bold and underlined**

| SYT1 Variant (Human) | Primer  | Sequence (5'-3')                                                |
|----------------------|---------|-----------------------------------------------------------------|
| L159R                | Forward | CCAGAATAACCAGCG <u><b>G</b></u> TTGGTGGGAATCATC                 |
|                      | Reverse | GATGATTCCCACCA <u><b>C</b></u> CGCTGGTTATTCTGG                  |
| T196K                | Forward | CCTGACAAAAAGAAGAAATTTGAGAA <u><b>A</b></u> GAAAGTCCACCGGAAAACCC |
|                      | Reverse | GGGTTTTCCGCTGGACTTT <u><b>C</b></u> TTCTCAAATTTCTTCTTTTTGTCAGG  |
| E209K                | Forward | CCCTCAATCCAGTCTTCAAT <u><b>A</b></u> AACAATTTACTTTCAAGGTACCCTA  |
|                      | Reverse | CCGAGTAGGGTACCTTGAAAGTAAATTGTT <u><b>T</b></u> ATTGAAGACTGGATT  |
| E219Q                | Forward | CAAGGTACCCTACTCG <u><b>C</b></u> AATTAGGTGGCAAAAACCC            |
|                      | Reverse | GGGTTTTGCCACCTAATT <u><b>G</b></u> CGAGTAGGGTACCTTG             |
| M303V                | Forward | CCTGAAGAAG <u><b>G</b></u> TGGATGTGGGTGGCTTATCTG                |
|                      | Reverse | CAGATAAGCCACCCACATCCA <u><b>C</b></u> CTTCTTCAGG                |
| S309P                | Forward | GATGGATGTGGGTGGCTT <u><b>C</b></u> CTGATCCCTACG                 |
|                      | Reverse | CGTAGGGATCAG <u><b>G</b></u> TAAGCCACCCACATCCATC                |
| Y365C                | Forward | GGTGGTAACTGTTTTGGACT <u><b>G</b></u> TGACAAGATTGGCAAGAACG       |
|                      | Reverse | CGTTCTTGCCAATCTTGTC <u><b>A</b></u> CAGTCCAAAACAGTTACCACC       |
| G369D                | Forward | GGAATATGACAAGATTG <u><b>A</b></u> CAAGAACGACGCGATCGGC           |
|                      | Reverse | GCCGATCGCGTCGTTCTT <u><b>G</b></u> TCAATCTGTCATAGTCC            |

**Supplementary Table 2a. Descriptive statistics for nerve terminal expression analysis (Fig 1C)**

|       | n  | Mean   | SD     | SEM     | 95% CI of mean |       | P-values (vs WT)* |
|-------|----|--------|--------|---------|----------------|-------|-------------------|
| WT    | 12 | 1.709  | 0.2486 | 0.07175 | 1.551          | 1.867 |                   |
| L159R | 8  | 0.9634 | 0.1599 | 0.05653 | 0.8297         | 1.097 | <b>0.0076</b>     |
| T196K | 12 | 1.795  | 0.3795 | 0.1095  | 1.553          | 2.036 | >0.9999           |
| E209K | 11 | 1.621  | 0.3594 | 0.1084  | 1.38           | 1.863 | >0.9999           |
| E219Q | 11 | 1.939  | 0.4825 | 0.1455  | 1.615          | 2.263 | >0.9999           |
| M303V | 11 | 1.856  | 0.4469 | 0.1347  | 1.556          | 2.156 | >0.9999           |
| S309P | 10 | 1.935  | 0.4139 | 0.1309  | 1.639          | 2.231 | >0.9999           |
| Y365C | 12 | 1.804  | 0.4498 | 0.1298  | 1.518          | 2.09  | >0.9999           |
| G369D | 12 | 1.731  | 0.4680 | 0.1351  | 1.434          | 2.029 | >0.9999           |
| I368T | 12 | 2.088  | 0.4311 | 0.1245  | 1.814          | 2.362 | 0.6015            |

\*P-values for Kruskal-Wallis test with Dunn's multiple comparison test compared to WT.

**Supplementary Table 2b. Descriptive statistics for coefficient of variation analysis (Fig 2B)**

|       | n | Mean  | SD    | SEM   | 95% CI of mean |       | P-values (vs WT)* |
|-------|---|-------|-------|-------|----------------|-------|-------------------|
| WT    | 9 | 46.44 | 4.676 | 1.559 | 42.84          | 50.03 |                   |
| L159R | 9 | 23.41 | 8.508 | 2.836 | 16.87          | 29.95 | <b>&lt;0.0001</b> |
| T196K | 7 | 46.45 | 11.93 | 4.51  | 35.41          | 57.48 | >0.9999           |
| E209K | 8 | 38.57 | 7.348 | 2.598 | 32.43          | 44.71 | 0.2691            |
| E219Q | 8 | 40.01 | 5.963 | 2.108 | 35.03          | 45    | 0.4936            |
| M303V | 8 | 40.36 | 11.44 | 4.045 | 30.8           | 49.93 | 0.5580            |
| S309P | 8 | 44.39 | 9.576 | 3.386 | 36.38          | 52.4  | 0.9987            |
| Y365C | 7 | 46.27 | 6.333 | 2.394 | 40.42          | 52.13 | >0.9999           |
| G369D | 7 | 44.47 | 5.223 | 1.974 | 39.64          | 49.3  | 0.9993            |
| I368T | 7 | 46.19 | 5.939 | 2.245 | 40.7           | 51.68 | >0.9999           |

\*P-values for one-way ANOVA with Dunnett's multiple comparison test compared to WT.

**Supplementary Table 2c. Descriptive statistics for vesicular localisation analysis (Fig 2E)**

|       | n | Mean  | SD    | SEM   | 95% CI of mean |       | P-values (vs WT)* |
|-------|---|-------|-------|-------|----------------|-------|-------------------|
| WT    | 9 | 54.04 | 6.927 | 2.309 | 48.72          | 59.37 |                   |
| L159R | 9 | 60.08 | 8.039 | 2.68  | 53.9           | 66.26 | >0.9999           |
| T196K | 7 | 62.11 | 4.941 | 1.868 | 57.54          | 66.68 | 0.4231            |
| E209K | 8 | 60.3  | 6.496 | 2.297 | 54.87          | 65.73 | >0.9999           |
| E219Q | 8 | 58.13 | 13.26 | 4.687 | 47.04          | 69.21 | >0.9999           |
| M303V | 8 | 58.83 | 10.96 | 3.873 | 49.67          | 67.99 | >0.9999           |
| S309P | 8 | 63.95 | 12.82 | 4.533 | 53.23          | 74.67 | 0.1454            |
| Y365C | 7 | 56.62 | 7.148 | 2.702 | 50.01          | 63.23 | >0.9999           |
| G369D | 7 | 63.09 | 7.464 | 2.821 | 56.18          | 69.99 | 0.2279            |
| I368T | 7 | 65.22 | 7.465 | 2.822 | 58.31          | 72.12 | 0.0904            |

\*P-values for Kruskal-Wallis test with Dunn's multiple comparison test compared to WT.

**Supplementary Table 2d. Descriptive statistics for C2B variant recycling pool size analysis (Fig 3A)**

|       | n | Mean  | SD    | SEM   | 95% CI of mean |       | P-values (vs WT)* |
|-------|---|-------|-------|-------|----------------|-------|-------------------|
| WT    | 9 | 50.18 | 5.78  | 1.927 | 45.74          | 54.63 |                   |
| M303V | 8 | 37.51 | 7.263 | 2.568 | 31.44          | 43.58 | <b>0.0143</b>     |
| S309P | 8 | 36.59 | 9.723 | 3.437 | 28.46          | 44.72 | <b>0.0077</b>     |
| Y365C | 8 | 53.64 | 7.394 | 2.614 | 47.46          | 59.82 | 0.8692            |
| G369D | 9 | 49.12 | 9.068 | 3.023 | 42.15          | 56.09 | 0.9991            |
| I368T | 8 | 41.38 | 10.33 | 3.653 | 32.74          | 50.02 | 0.1361            |

\*P-values for one-way ANOVA with Dunnett's multiple comparison test compared to WT.

**Supplementary Table 2e. Descriptive statistics for C2A variant recycling pool size analysis (Fig 3B)**

|       | n  | Mean  | SD    | SEM   | 95% CI of mean |       | P-values (vs WT)* |
|-------|----|-------|-------|-------|----------------|-------|-------------------|
| WT    | 10 | 53.88 | 8.94  | 2.827 | 47.48          | 60.27 |                   |
| L159R | 9  | 48.3  | 9.772 | 3.257 | 40.79          | 55.81 | 0.6012            |
| T196K | 11 | 57.44 | 6.779 | 2.044 | 52.88          | 61.99 | 0.8718            |
| E209K | 9  | 56.12 | 6.251 | 2.084 | 51.32          | 60.93 | 0.9826            |
| E219Q | 9  | 47.02 | 15.04 | 5.012 | 35.46          | 58.58 | 0.4059            |
| I368T | 7  | 50.3  | 8.752 | 3.308 | 42.2           | 58.39 | 0.9139            |

\*P-values for one-way ANOVA with Dunnett's multiple comparison test compared to WT.

**Supplementary Table 2f. Descriptive statistics for C2B variant exocytosis tau analysis (Fig 3E)**

|       | n | Mean  | SD    | SEM   | 95% CI of mean |       | P-values (vs WT)* |
|-------|---|-------|-------|-------|----------------|-------|-------------------|
| WT    | 9 | 23.45 | 3.412 | 1.137 | 20.82          | 26.07 |                   |
| M303V | 8 | 43.96 | 15.02 | 5.309 | 31.4           | 56.51 | <b>0.0206</b>     |
| S309P | 8 | 57.49 | 25.72 | 9.093 | 35.99          | 78.99 | <b>&lt;0.0001</b> |
| Y365C | 8 | 36.47 | 10.53 | 3.723 | 27.67          | 45.28 | 0.2322            |
| G369D | 9 | 35.14 | 11.82 | 3.94  | 26.05          | 44.23 | 0.2976            |
| I368T | 8 | 44.47 | 9.814 | 3.47  | 36.26          | 52.67 | <b>0.0170</b>     |

\*P-values for one-way ANOVA with Dunnett's multiple comparison test compared to WT.

**Supplementary Table 2g. Descriptive statistics for C2A variant exocytosis tau analysis (Fig 3F)**

|       | n  | Mean  | SD    | SEM    | 95% CI of mean |       | P-values (vs WT)* |
|-------|----|-------|-------|--------|----------------|-------|-------------------|
| WT    | 10 | 23.22 | 3.082 | 0.9747 | 21.02          | 25.43 |                   |
| L159R | 9  | 30.26 | 12.81 | 4.271  | 20.41          | 40.11 | 0.8385            |
| T196K | 11 | 27.6  | 8.145 | 2.456  | 22.13          | 33.07 | >0.9999           |
| E209K | 9  | 30.61 | 8.24  | 2.747  | 24.28          | 36.95 | 0.2283            |
| E219Q | 9  | 37.01 | 17.24 | 5.747  | 23.76          | 50.27 | 0.0742            |
| I368T | 7  | 39.27 | 12.06 | 4.56   | 28.12          | 50.43 | <b>0.0092</b>     |

\*P-values for Kruskal-Wallis test with Dunn's multiple comparison test compared to WT.

**Supplementary Table 2h. Descriptive statistics for C2B variant initial exocytic rate analysis (Fig 4B)**

|       | n | Mean     | SD       | SEM      | 95% CI of mean |          | P-values (vs WT)* |
|-------|---|----------|----------|----------|----------------|----------|-------------------|
| WT    | 9 | 0.0169   | 0.004124 | 0.001375 | 0.01373        | 0.02006  |                   |
| M303V | 8 | 0.007823 | 0.005722 | 0.002023 | 0.00304        | 0.01261  | <b>0.0009</b>     |
| S309P | 8 | 0.005951 | 0.004176 | 0.001476 | 0.00246        | 0.009441 | <b>&lt;0.0001</b> |
| Y365C | 8 | 0.01023  | 0.004702 | 0.001662 | 0.006301       | 0.01416  | <b>0.0196</b>     |
| G369D | 9 | 0.01084  | 0.005058 | 0.001686 | 0.006953       | 0.01473  | <b>0.0318</b>     |
| I368T | 8 | 0.006544 | 0.003324 | 0.001175 | 0.003765       | 0.009322 | <b>0.0001</b>     |

\*P-values for one-way ANOVA with Dunnett's multiple comparison test compared to WT.

**Supplementary Table 2i. Descriptive statistics for C2A variant initial exocytic rate analysis (Fig 4D)**

|       | n  | Mean    | SD       | SEM      | 95% CI of mean |         | P-values (vs WT)* |
|-------|----|---------|----------|----------|----------------|---------|-------------------|
| WT    | 10 | 0.02232 | 0.009249 | 0.002925 | 0.01571        | 0.02894 |                   |
| L159R | 9  | 0.01722 | 0.00646  | 0.002153 | 0.01225        | 0.02218 | 0.4016            |
| T196K | 11 | 0.0185  | 0.005556 | 0.001675 | 0.01476        | 0.02223 | 0.6250            |
| E209K | 9  | 0.01742 | 0.006819 | 0.002273 | 0.01218        | 0.02266 | 0.4403            |
| E219Q | 9  | 0.01551 | 0.008341 | 0.00278  | 0.009101       | 0.02192 | 0.1596            |
| I368T | 7  | 0.01009 | 0.004904 | 0.001854 | 0.005551       | 0.01462 | <b>0.0048</b>     |

\*P-values for one-way ANOVA with Dunnett's multiple comparison test compared to WT.

**Supplementary Table 2j. Descriptive statistics for C2B variant RRP size analysis (Fig 5B)**

|       | n  | Mean  | SD    | SEM    | 95% CI of mean |       | P-values (vs WT)* |
|-------|----|-------|-------|--------|----------------|-------|-------------------|
| WT    | 9  | 5.754 | 3.049 | 1.016  | 3.411          | 8.098 |                   |
| M303V | 11 | 3.148 | 1.63  | 0.4914 | 2.053          | 4.243 | <b>0.0386</b>     |
| S309P | 9  | 2.274 | 2.072 | 0.6908 | 0.6805         | 3.867 | <b>0.0053</b>     |
| Y365C | 9  | 3.81  | 1.965 | 0.6551 | 2.3            | 5.321 | 0.2107            |
| G369D | 10 | 4.487 | 2.464 | 0.7791 | 2.725          | 6.25  | 0.5712            |
| I368T | 9  | 1.978 | 1.37  | 0.4567 | 0.9252         | 3.031 | <b>0.0022</b>     |

\*P-values for one-way ANOVA with Dunnett's multiple comparison test compared to WT.

**Supplementary Table 2k. Descriptive statistics for C2A variant RRP size analysis (Fig 5D)**

|       | n  | Mean  | SD    | SEM    | 95% CI of mean |       | P-values (vs WT)* |
|-------|----|-------|-------|--------|----------------|-------|-------------------|
| WT    | 11 | 5.351 | 1.856 | 0.5597 | 4.104          | 6.599 |                   |
| L159R | 11 | 4.235 | 2.208 | 0.6658 | 2.751          | 5.718 | 0.6252            |
| T196K | 9  | 4.849 | 1.689 | 0.5631 | 3.551          | 6.148 | 0.9801            |
| E209K | 11 | 5.681 | 1.769 | 0.5333 | 4.492          | 6.869 | 0.9962            |
| E219Q | 11 | 6.304 | 3.26  | 0.9829 | 4.114          | 8.494 | 0.7510            |
| I368T | 8  | 1.806 | 0.974 | 0.3444 | 0.9922         | 2.621 | <b>0.0034</b>     |

\*P-values for one-way ANOVA with Dunnett's multiple comparison test compared to WT.

**Supplementary Table 3. SYT1-associated Neurodevelopmental Disorder participant characteristics**

|                                                                             | <b>N</b>           | <b>Mean (SD)</b> | <b>Range</b> | <b>Median</b> | <b>Interquartile range</b> |
|-----------------------------------------------------------------------------|--------------------|------------------|--------------|---------------|----------------------------|
| Sex                                                                         | 7 female<br>7 male | -                |              |               |                            |
| Age <sup>a</sup><br><i>Years</i>                                            | 14                 | 9.9 (6.17)       | 3.25 - 25.79 | 8.41          | 5.82 - 12.35               |
| Global adaptive function<br><i>Vineland Adaptive Behaviour Composite</i>    | 12                 | 44.83 (17.98)    | 20 - 74      | 41            | 32.5 - 56                  |
| Behavioural and emotional difficulties<br><i>DBC total problems T-score</i> | 11                 | 56.64 (8.21)     | 40 - 68      | 60            | 51.5 - 62.5                |

<sup>a</sup>Age at time of questionnaire completion (n=13) or clinical data collection (n=1)

**Supplementary Table 4. SYT1-associated Neurodevelopmental Disorder participant clinical phenotypes**

| Clinical feature<br>HPO Term Identifier <sup>a</sup>   | Data<br>available<br>(n) | Frequency<br>of Feature<br>(n) | Frequency<br>of Feature<br>(%) | Subtype (n)                                                                                                                                                                                                 |
|--------------------------------------------------------|--------------------------|--------------------------------|--------------------------------|-------------------------------------------------------------------------------------------------------------------------------------------------------------------------------------------------------------|
| Delayed speech and language development<br>HP: 0000750 | 14                       | 14                             | 100                            | Mild = using words and phrases (5); moderate = using single words only (2); severe = not using any words (4); unable to classify as under age 5 years or insufficient information (3)                       |
| Abnormal eye physiology<br>HP: 0012373                 | 14                       | 12                             | 86                             | Strabismus (7); nystagmus (4); hypermetropia (1); visual impairment unspecified (1)                                                                                                                         |
| Motor delay<br>HP: 0001270                             | 14                       | 14                             | 100                            | Mild = walked by 3 years (5); moderate = walked by 5 years (2); severe = walked after 5 years or nonambulatory over the age of 5 (5); unable to classify because nonambulatory under the age of 5 years (2) |
| Neonatal hypotonia<br>HP: 0001319                      | 14                       | 11                             | 79                             | -                                                                                                                                                                                                           |
| Abnormality of movement<br>HP: 0100022                 | 14                       | 11                             | 79                             | Dystonia (5); chorea (7); dyskinesia (3); ataxia (5); myoclonus (3); tremor (3); stereotypies (5); Tourette syndrome (1)                                                                                    |
| Sleep disturbance<br>HP: 0002360                       | 13                       | 9                              | 69                             | -                                                                                                                                                                                                           |
| Abdominal symptom<br>HP: 0011458                       | 14                       | 8                              | 57                             | Feeding difficulties (6); gastroesophageal reflux (2); drooling (1); constipation (2); urinary infection (2); pancreatitis with pseudocysts (1)                                                             |
| Self-injurious behaviour<br>HP: 0100716                | 14                       | 11                             | 79                             | Finger biting or chewing (7); head banging (2); skin picking (1); hair pulling (1); other or unspecified (2)                                                                                                |
| Seizure<br>HP: 0001250                                 | 14                       | 4                              | 29                             | -                                                                                                                                                                                                           |

|                                                                   |    |   |    |                                                                                      |
|-------------------------------------------------------------------|----|---|----|--------------------------------------------------------------------------------------|
| MRI abnormality<br>HP: 0012639                                    | 13 | 3 | 23 | -                                                                                    |
| Abnormality of the<br>respiratory system<br>HP: 0002086           | 13 | 2 | 15 | Hyperventilation with cyanosis<br>(1); autonomic dysfunction with<br>hypotension (1) |
| Phenotypic<br>abnormality<br>HP: 0000118                          | 13 | 4 | 31 | Undescended testicle (1);<br>dermoid cyst (1); talipes (2)                           |
| Abnormality of<br>prenatal development<br>or birth<br>HP: 0001197 | 14 | 2 | 14 | Mild prematurity (1); neonatal<br>resuscitation (2)                                  |

---

<sup>a</sup>Human Phenotype Ontology (<https://hpo.jax.org/app/>).

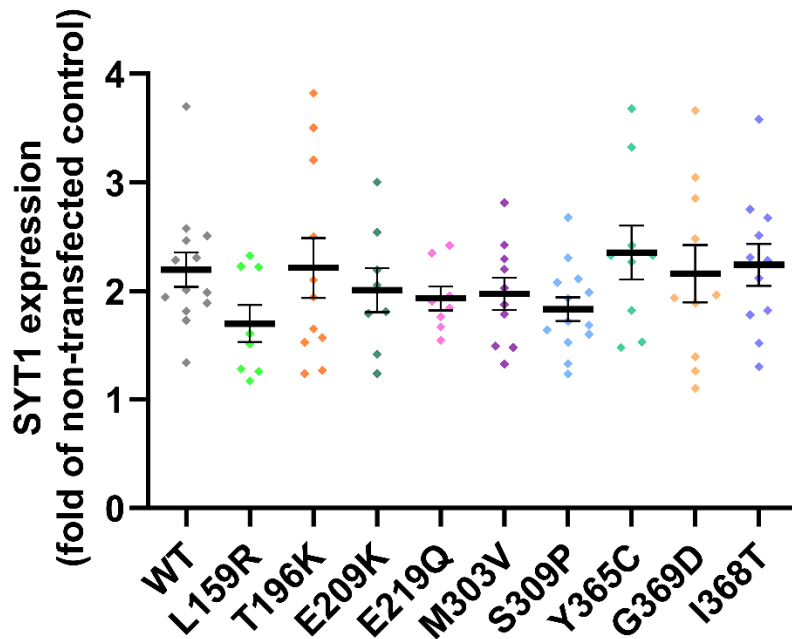

**Supplementary Figure 1. SYT1 variants are expressed as efficiently as the WT protein within neuronal cell soma.** Hippocampal neurons co-transfected with SYT1-pHluorin variants and empty vector pcDNA3.1 were fixed and immunolabelled for GFP (i.e. pHluorin) and SYT1. SYT1 somatic expression levels are expressed as the SYT1 immunofluorescence intensity in transfected neurons, relative to non-transfected neurons in the same field of view. Data displayed as mean  $\pm$  SEM,  $n = 8-13$ . One-way ANOVA with Dunnett's multiple comparison test compared to WT ( $n = 13$ ); L159R  $p = 0.42$  (8), T196K  $p > 0.99$  (11), E209K  $p = 0.99$  (8), E219Q  $p = 0.95$  (8), M303V  $p = 0.97$  (10), S309P  $p = 0.63$  (13), Y365C  $p = 0.99$  (9), G369D  $p > 0.99$  (10), I368T  $p > 0.99$  (11). For all experiments, 'n' refers to an individual field of view from an independent coverslip. All experiments were repeated across at least 3 independent cultures, with each culture comprising at least 3 embryos.



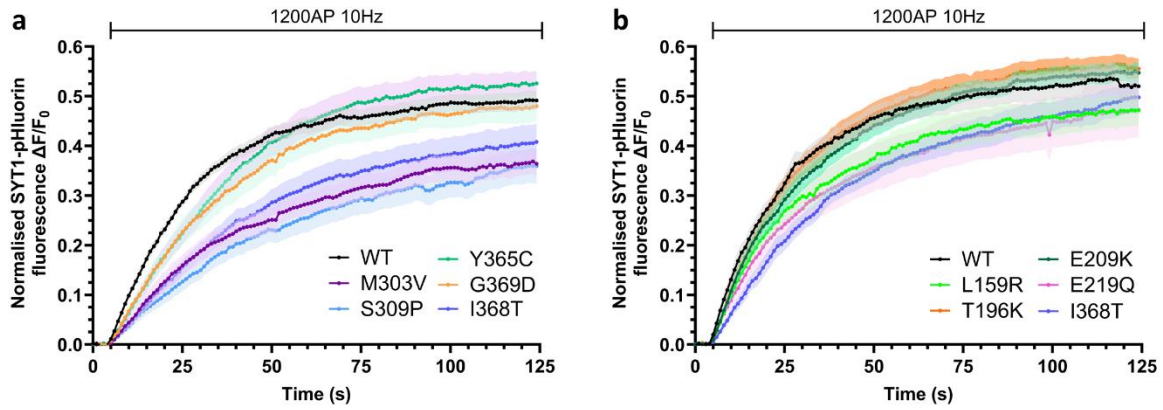

**Supplementary Figure 2. C2B and C2A domain SYT1 variants induce a dominant-negative slowing of exocytosis.** Hippocampal neurons transfected with SYT1-pHluorin variants or wild-type SYT1-pHluorin were stimulated with 1200 AP at 10 Hz in the presence of bafilomycin A1, and then perfused with ammonia buffer to reveal total SYT1-pHluorin fluorescence. **(a, b)** Time course of mean  $\Delta F/F_0$  of C2B (A) or C2A (B) domain SYT1-pHluorin variants normalised to peak amplitude of fluorescence change induced by ammonia buffer perfusion. Shaded areas indicate the standard error of the mean (SEM).

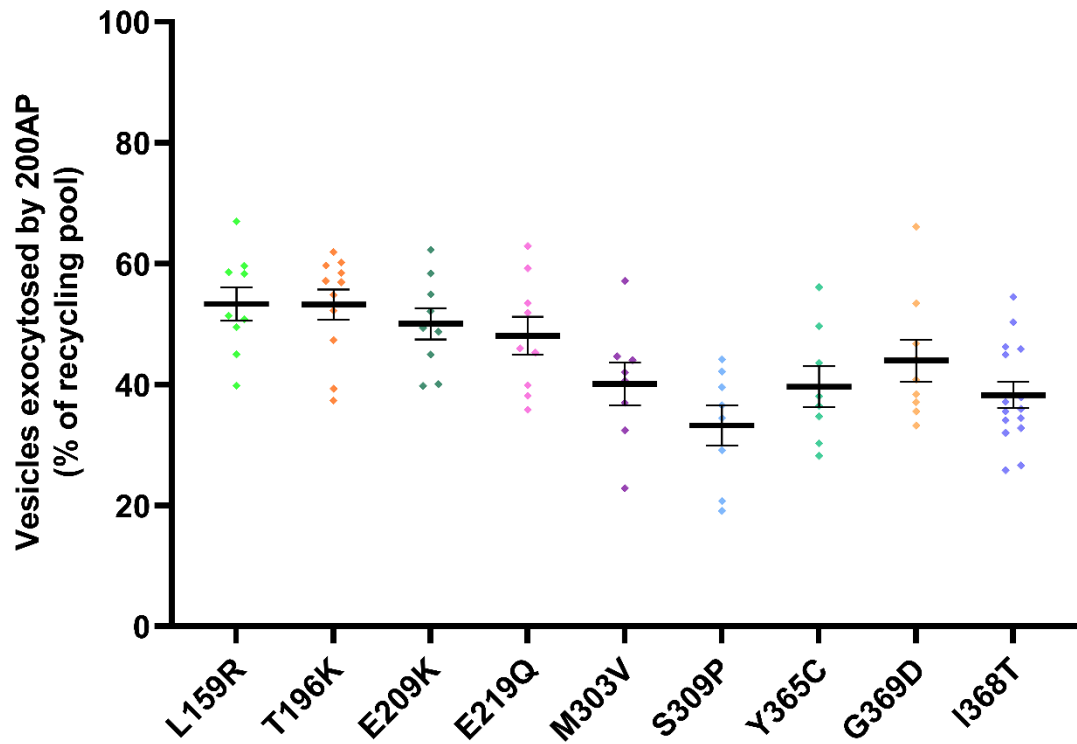

**Supplementary Figure 3. The number of synaptic vesicles exocytosed cumulatively by 200 AP stimulation.** The percentage of synaptic vesicles cumulatively exocytosed following 200AP (i.e. after 20 seconds of stimulation) stimulation, as a proportion of the total recycling pool of vesicles, was determined for all SYT1 variants. Data displayed is mean +/- SEM.

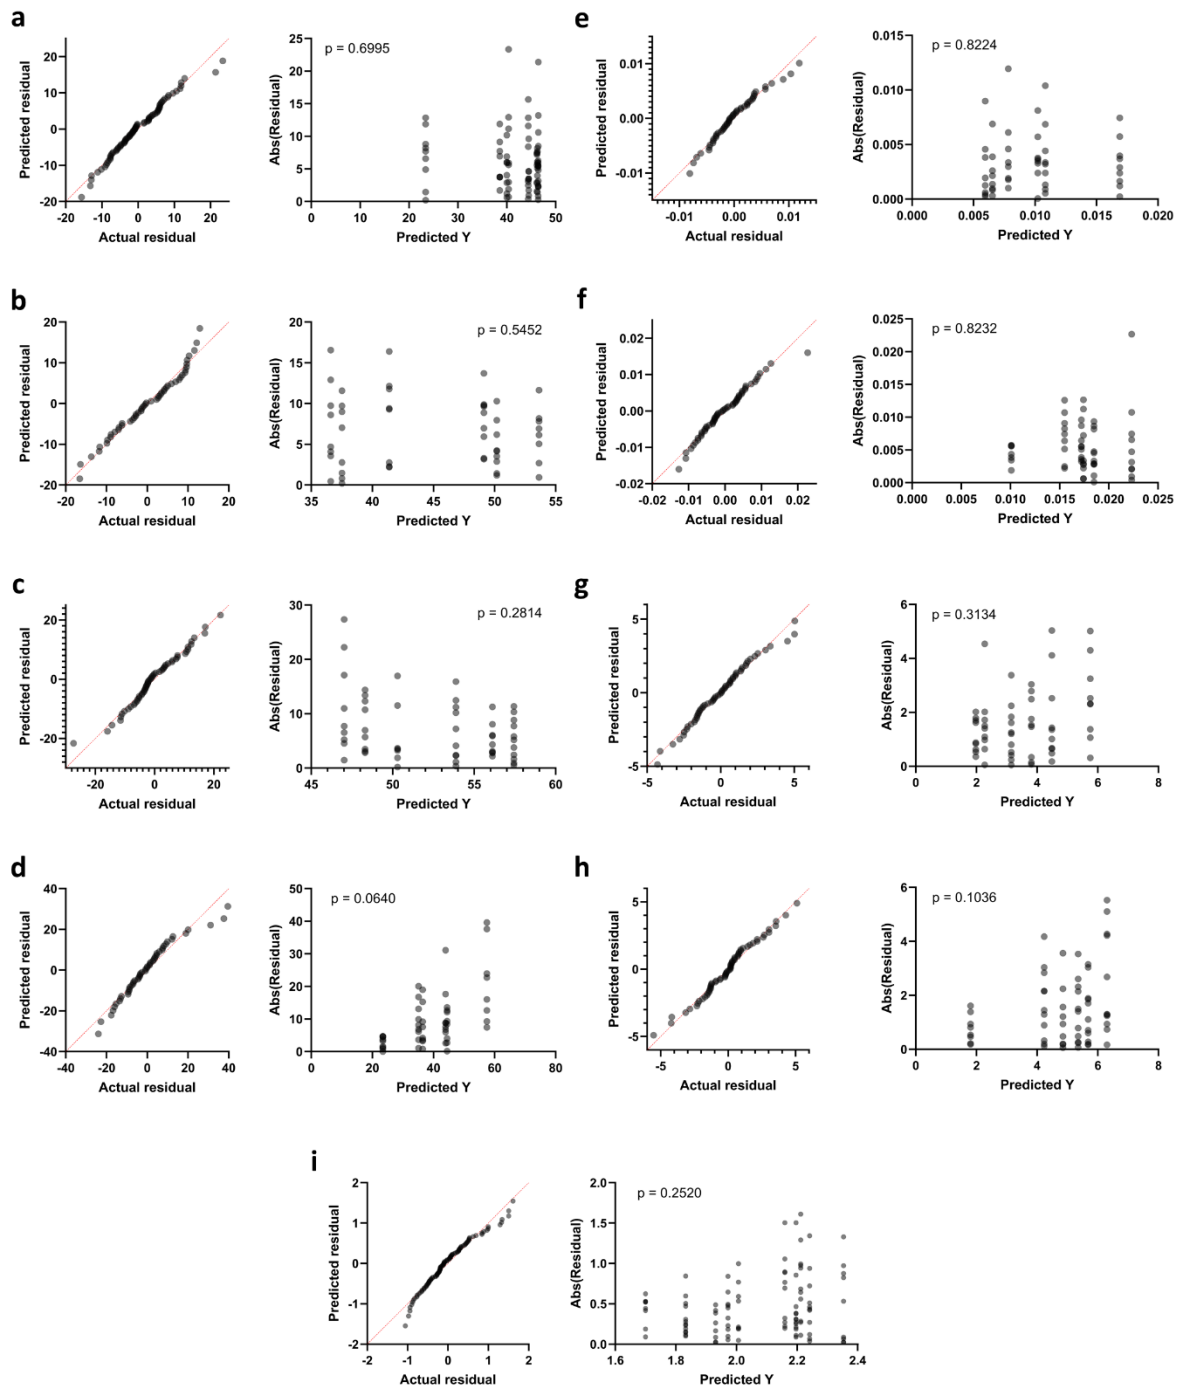

**Supplementary Figure 4. Testing of assumptions for one-way ANOVA data.** Q-Q residual plots (*left panel*) for assessing normality of data, and homoscedasticity plots (*right panel*) for assessing homogeneity of variance between data groups, for data sets analysed through one-way ANOVA which include **(a)** coefficient of variation (CV), Fig 2b, **(b)** C2B variant recycling pool (RP) size, Fig 3a, **(c)** C2A variant RP size, Fig 3b, **(d)** C2B variant exocytic tau, Fig 3e, **(e)** C2B variant initial exocytic rate, Fig 4b, **(f)** C2A variant initial exocytic rate, Fig 4d, **(g)** C2B variant readily releasable pool (RRP) size, Fig 5b, **(h)** C2A variant RRP size, Fig 5d, and **(i)** somatic SYT1 expression levels, Supp Fig 1. Brown-Forsythe test for homoscedasticity was performed for each data set, with the corresponding p-values reported.

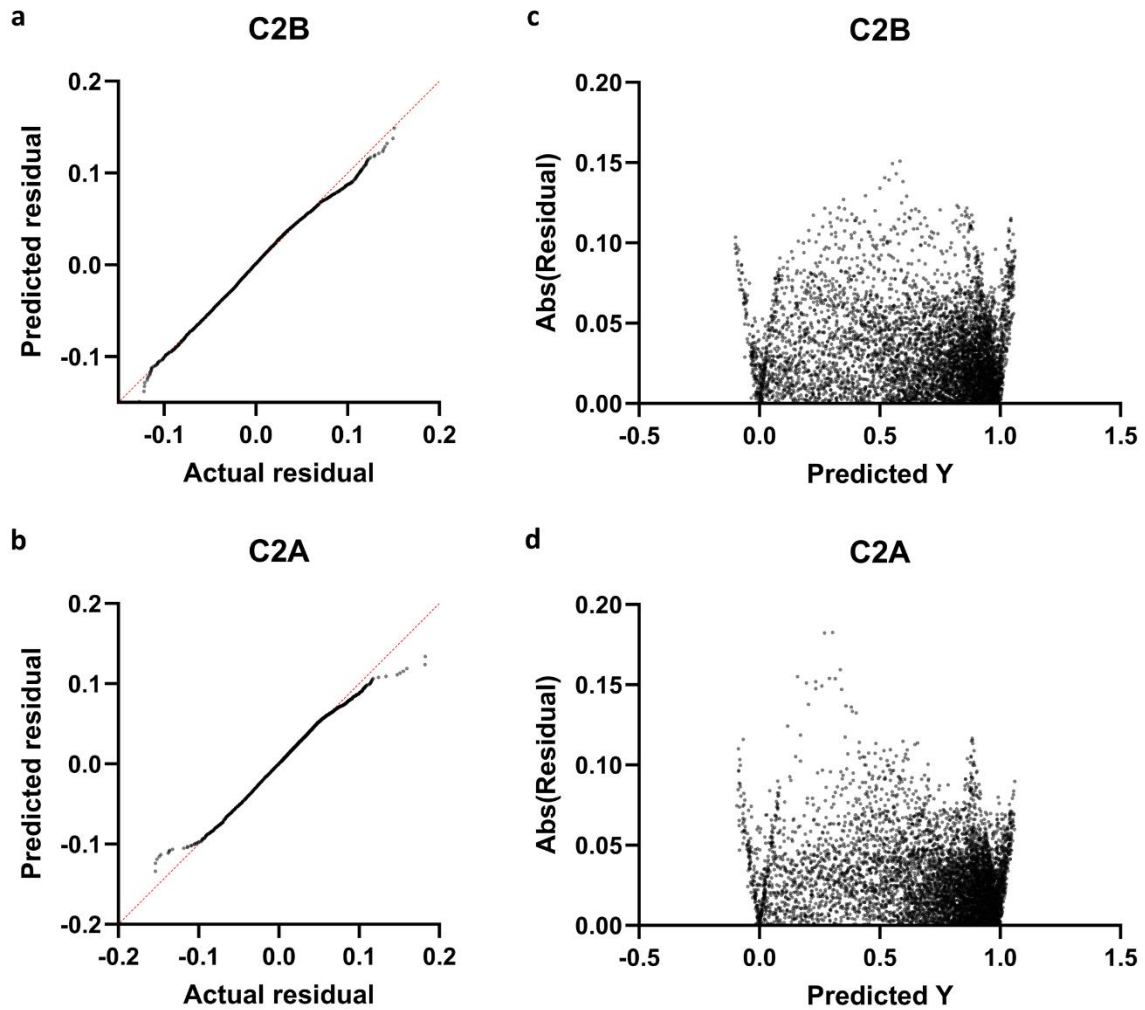

**Supplementary Figure 5. Testing of assumptions for repeated measures (two-way) ANOVA data.** (a, b) Q-Q residual plots of data sets analysed through repeated measures ANOVA, for assessing normality of data. (c, d) Homoscedasticity plots of data sets analysed through repeated measures ANOVA, for assessing homogeneity of variance between data groups. Repeated measures mixed model ANOVA was performed with no assumption of sphericity and using the Geisser-Greenhouse correction.

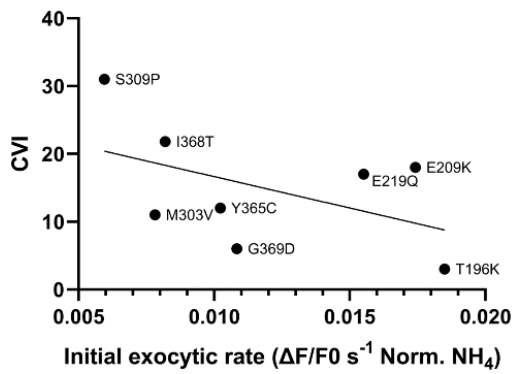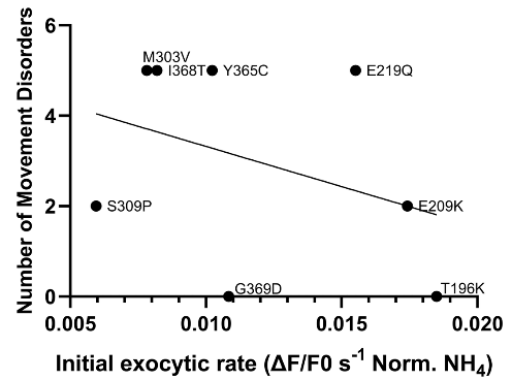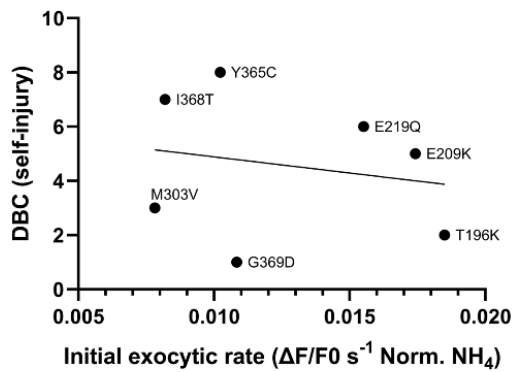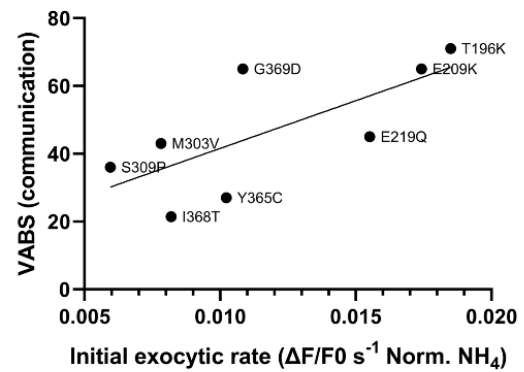

**Supplementary Figure 6. Scatter plots of non-significant correlations between initial exocytic rate in the presence of SYT1 variants and clinical measures of individuals with SYT1 variants.** Quantitative phenotypes exhibited by individuals harbouring SYT1 variants were each correlated with the functional measure of initial exocytic rate over the first 5 seconds of 10Hz stimulation. Clinical measures include the communication subscale of the Vineland Adaptive Behaviour Scale (VABS), number of movement disorders, self-injury scores from Developmental Behaviour Checklist (DBC), and cerebral visual impairment (CVI). Correlation values can be found in Table 1 of the main text.

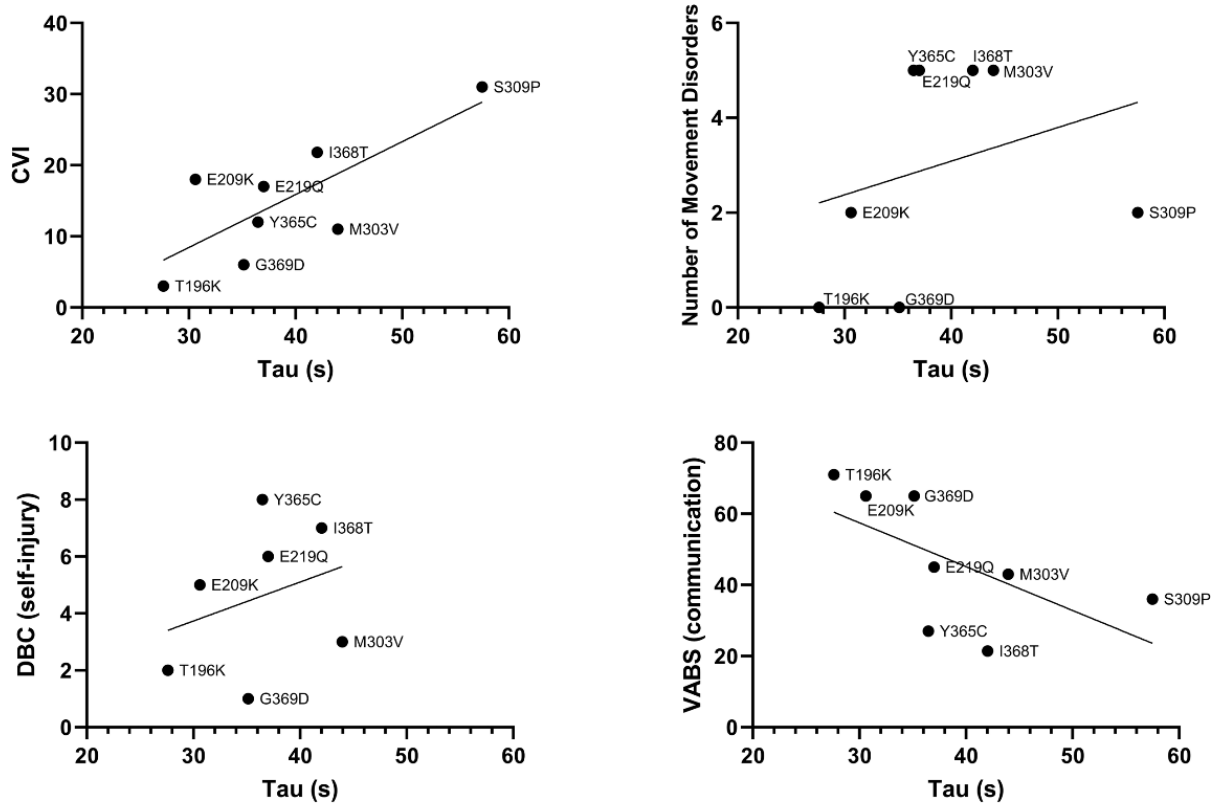

**Supplementary Figure 7. Scatter plots of non-significant correlations between tau constant values in the presence of SYT1 variants and clinical measures of individuals with SYT1 variants.** Quantitative phenotypes exhibited by individuals harbouring SYT1 variants were each correlated with the functional measure for overall exocytic rate (tau). Clinical measures include the communication subscale of the Vineland Adaptive Behaviour Scale (VABS), number of movement disorders, self-injury scores from Developmental Behaviour Checklist (DBC), and cerebral visual impairment (CVI). Correlation values can be found in Table 1 of the main text.

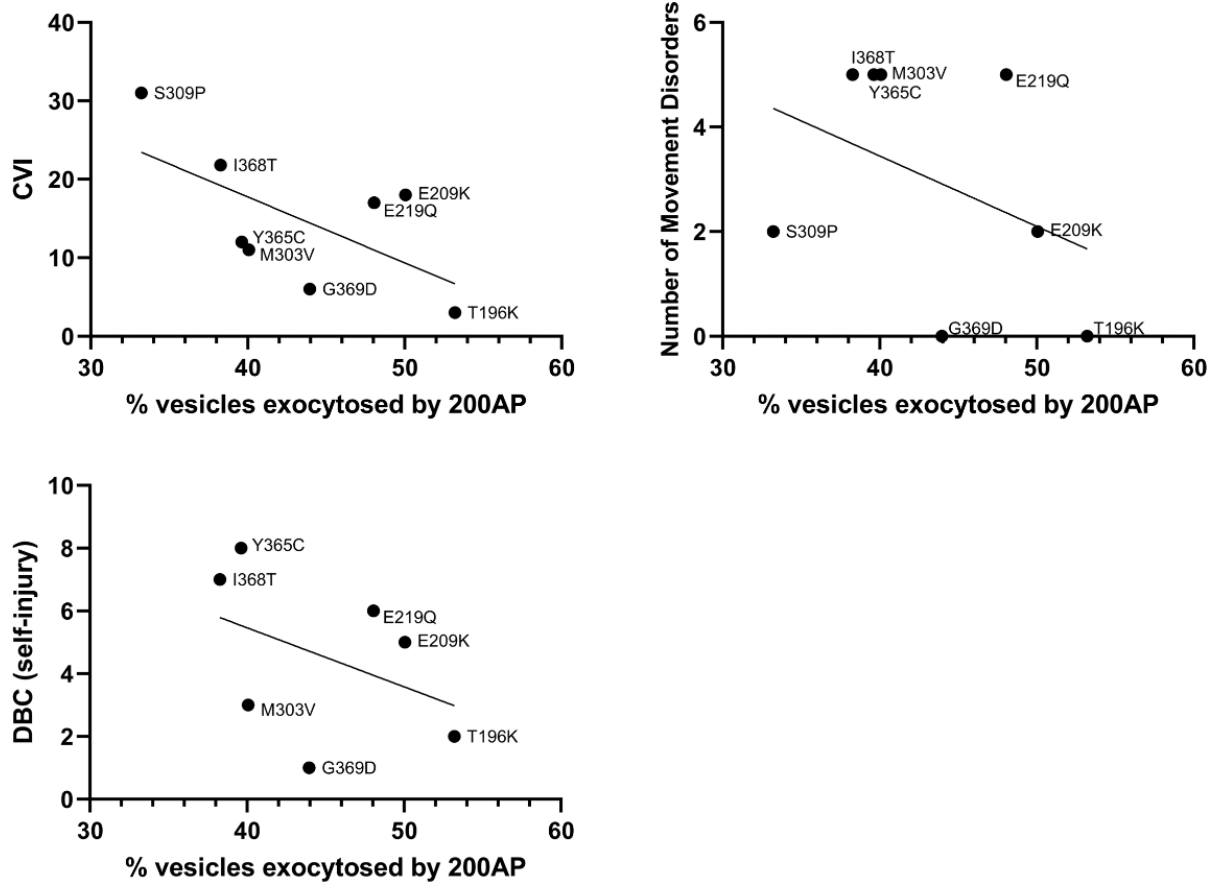

**Supplementary Figure 8.** Scatter plots of non-significant correlations between the percentage of vesicles fused by 200AP in the presence of SYT1 variants and clinical measures of individuals with SYT1 variants. Quantitative phenotypes exhibited by individuals harbouring SYT1 variants were each correlated with the functional measure of percentage of vesicles fused by 200AP. Clinical measures include number of movement disorders, self-injury scores from Developmental Behaviour Checklist (DBC), and cerebral visual impairment (CVI). Correlation values can be found in Table 1 of the main text.
